# Supplementary material
Source: ML conference proceedings conference paper supplement (https://proceedings.neurips.cc/paper_files/paper/2020/hash/4a5cfa9281924139db466a8a19291aff-Abstract.html)
Supplement: Supplementary file [file 4a5cfa9281924139db466a8a19291aff-Supplemental.pdf]

## Appendices

### A Proof for Theorem 1

Before proceeding, let us define an additional term  $\bar{S} = \sum_{k=1}^K |\mathcal{S}_{i_k}|$ , which is the sum over equivalence classes of the number of internal states in a subMDP from each class. Intuitively,  $\bar{S}$  can be thought of as the number of distinct internal states. Note that trivially, we have  $\bar{S} \leq KM$ .

For any MDP  $\tilde{\mathcal{M}}$  consistent with the prior  $\mathcal{P}^0$  and any policy  $\pi : \mathcal{S} \rightarrow \mathcal{A}$ , we use  $V^{\tilde{\mathcal{M}}, \pi}$  to denote the expected total reward in  $\tilde{\mathcal{M}}$  under policy  $\pi$ , with initial state  $s_0$ . Then by definition, we have

$$\begin{aligned} \text{BayesRegret}(\text{PSHRL}, T) &= \sum_{t=1}^T \mathbb{E} \left[ V^{\mathcal{M}, \pi^*} - V^{\mathcal{M}, \pi^t} \right] \\ &= \sum_{t=1}^T \mathbb{E} \left[ V^{\mathcal{M}, \pi^*} - V^{\mathcal{M}, \tilde{\pi}} \right] + \sum_{t=1}^T \mathbb{E} \left[ V^{\mathcal{M}, \tilde{\pi}} - V^{\mathcal{M}, \pi^t} \right] \\ &= \mathbb{E} \left[ V^{\mathcal{M}, \pi^*} - V^{\mathcal{M}, \tilde{\pi}} \right] T + \sum_{t=1}^T \mathbb{E} \left[ V^{\mathcal{M}, \tilde{\pi}} - V^{\mathcal{M}, \pi^t} \right], \end{aligned} \quad (5)$$

where the last equality follows from the fact that  $V^{\mathcal{M}, \pi^*}$  and  $V^{\mathcal{M}, \tilde{\pi}}$  do not depend on  $t$ . Let  $\mathcal{H}_t$  denote the ‘‘history’’ at the start of episode  $t$ , which includes all the observations by the start of episode  $t$ . Notice that conditioning on  $\mathcal{H}_t, \mathcal{M}_t$  and  $\mathcal{M}$  are i.i.d. Since by definition,  $\tilde{\pi} = \text{plan}(\mathcal{M})$ ,  $\pi^t = \text{plan}(\mathcal{M}^t)$ , and  $\text{plan}$  is a deterministic mapping, thus, conditioning on  $\mathcal{H}_t, (\mathcal{M}, \tilde{\pi})$  and  $(\mathcal{M}^t, \pi^t)$  are also i.i.d. So we have  $\mathbb{E} [V^{\mathcal{M}, \tilde{\pi}} | \mathcal{H}_t] = \mathbb{E} [V^{\mathcal{M}^t, \pi^t} | \mathcal{H}_t]$ , which implies that

$$\mathbb{E} [V^{\mathcal{M}, \tilde{\pi}}] = \mathbb{E} [\mathbb{E} [V^{\mathcal{M}, \tilde{\pi}} | \mathcal{H}_t]] = \mathbb{E} [\mathbb{E} [V^{\mathcal{M}^t, \pi^t} | \mathcal{H}_t]] = \mathbb{E} [V^{\mathcal{M}^t, \pi^t}].$$

Thus, we have

$$\sum_{t=1}^T \mathbb{E} [V^{\mathcal{M}, \tilde{\pi}} - V^{\mathcal{M}, \pi^t}] = \sum_{t=1}^T \mathbb{E} [V^{\mathcal{M}^t, \pi^t} - V^{\mathcal{M}, \pi^t}].$$

For any policy  $\pi$  and any MDP  $\tilde{\mathcal{M}}$ , we use  $\mathcal{T}^{\tilde{\mathcal{M}}, \pi}$  to denote the dynamic programming operator in  $\tilde{\mathcal{M}}$  under  $\pi$ . In other words, the Bellman equation in any MDP  $\tilde{\mathcal{M}}$  under any policy  $\pi$  is  $V^{\tilde{\mathcal{M}}, \pi} = \mathcal{T}^{\tilde{\mathcal{M}}, \pi} V^{\tilde{\mathcal{M}}, \pi}$ . Then from Section 5.1 of [Osband et al. \[2013\]](#), we have

$$\mathbb{E} [V^{\mathcal{M}^t, \pi^t} - V^{\mathcal{M}, \pi^t} | \mathcal{M}^t, \mathcal{M}] = \mathbb{E} \left[ \sum_{h=1}^{\tau_t-1} \left( \mathcal{T}^{\mathcal{M}^t, \pi^t} - \mathcal{T}^{\mathcal{M}, \pi^t} \right) V^{\mathcal{M}^t, \pi^t}(s_{th}) \middle| \mathcal{M}, \mathcal{M}^t \right],$$

where  $s_{th}$ ’s are generated under policy  $\pi^t$  in the real MDP  $\mathcal{M}$ . The above equation decomposes the per-episode regret into one-step Bellman errors.

We now construct a high-probability confidence set. For any two non-terminal states  $s, s' \in \mathcal{S}$ , we say  $s$  and  $s'$  are **equivalent states** if they are internal states in two equivalent subMDPs, and the bijection between these two subMDPs maps  $s$  to  $s'$ . Obviously, the notion of equivalent states is transitive. Let  $\{\mathcal{X}_k\}_k$  be a partition of  $\mathcal{S}$  based on equivalent states. That is, each  $\mathcal{X}_k$  is an equivalent state class. By definition, we have  $|\{\mathcal{X}_k\}_k| = \bar{S}$ . For each episode  $t$ , let  $N^t(k, a)$  denote the number of times action  $a$  has been chosen at a state in the **equivalent state class**  $k$  in the first  $t - 1$  episodes. We also use  $\hat{P}^t$  and  $\hat{r}^t$  to respectively denote the empirical transition model and the empirical average reward based on observations in the first  $t - 1$  episodes. Specifically,

- $\hat{P}^t(\cdot | s, a)$  and  $\hat{r}^t(s, a)$  are estimated based on observations of choosing action  $a$  at state  $s$  **or its equivalent states**.
- If  $N^t(s, a) = 0$ ,  $\hat{P}^t(\cdot | s, a)$  and  $\hat{r}^t(s, a)$  are not well defined. In this case, we choose  $\hat{r}^t(s, a)$  as an arbitrary number in  $[0, 1]$  and  $\hat{P}^t(\cdot | s, a)$  as an arbitrary distribution subject to the constraint that  $\hat{P}^t(s' | s, a) > 0$  only if  $s'$  and  $s$  are in the same subMDP.

Recall that the prior  $\mathcal{P}^0$ , and hence all the posteriors  $\mathcal{P}^t$ , encodes the hierarchical information about equivalent subMDPs. Consequently, the PSHRL algorithm will only sample MDPs satisfying this equivalent subMDP restriction. Thus, we choose the confidence set at episode  $t$  as:

$$\mathbb{M}_t = \left\{ \tilde{\mathcal{M}} : \begin{aligned} & \left\| \hat{P}^t(\cdot|s, a) - P_k^{\tilde{\mathcal{M}}}(\cdot|s, a) \right\|_1 \leq \beta_1(N^t(k_s, a), t) \quad \forall s, a, \\ & \left| \hat{r}^t(s, a) - \bar{r}^{\tilde{\mathcal{M}}}(s, a) \right| \leq \beta_2(N^t(k_s, a), t) \quad \forall s, a, \\ & \text{and } \tilde{\mathcal{M}} \text{ satisfies the equivalent subMDP restriction} \end{aligned} \right\}, \quad (6)$$

where  $k_s$  is the equivalent state class that state  $s$  is in. Let  $A = |\mathcal{A}|$ , and recall that  $M = \max_i |\mathcal{S}_i \cup \mathcal{E}_i|$ , we have the following lemma:

**Lemma 1** For any  $\delta \in (0, 1)$ , if we choose  $\beta_1$  and  $\beta_2$  as  $\beta_1(n, t) = \sqrt{\frac{14M \log(\frac{2AK\tau_{\max}t}{\delta})}{\max\{1, n\}}}$  and  $\beta_2(n, t) = \sqrt{\frac{7 \log(\frac{2MAK\tau_{\max}t}{\delta})}{2 \max\{1, n\}}}$ , then we have

$$P(\mathcal{M} \notin \mathbb{M}_t) = P(\mathcal{M}^t \notin \mathbb{M}_t) \leq \frac{\delta}{15t^6}.$$

**Proof:** This lemma is based on Lemma 17 of Jaksch et al. [2010], which is based on the following two results:

- **$L_1$ -deviation of the true distribution and the empirical distribution:** Assume  $p(\cdot)$  is a distribution over  $m$  distinct events and  $\hat{p}(\cdot)$  is an empirical distribution for  $p$  from  $n$  i.i.d. samples. From Theorem 2.1 in Weissman et al. [2003], for any  $\epsilon > 0$ , we have

$$P\{\|p(\cdot) - \hat{p}(\cdot)\|_1 \geq \epsilon\} \leq (2^m - 2) \exp\left(-\frac{n\epsilon^2}{2}\right). \quad (7)$$

- **Hoeffding's inequality:** For the deviation between the true mean  $\bar{r}$  and the empirical mean  $\hat{r}$  from  $n$  i.i.d. samples with support in  $[0, 1]$ , for any  $\epsilon \geq 0$ , we have

$$P\{|\bar{r} - \hat{r}| \geq \epsilon\} \leq 2 \exp(-2n\epsilon^2).$$

Notice that at any state  $s$ , under action  $a$ , based on the definition of  $M$ , the agent might transit to at most  $M$  states. Thus, in this case we can use inequality 7 with  $m = M$ . Assume that  $\hat{P}^t(\cdot|s, a)$  is an empirical distribution based on  $n \geq 1$  i.i.d. samples from the true distribution  $P^{\mathcal{M}}(\cdot|s, a)$ , then from

Lemma 17 of Jaksch et al. [2010], by choosing  $\beta_1(n, t) = \sqrt{\frac{14M \log(\frac{2AK\tau_{\max}t}{\delta})}{\max\{1, n\}}}$ , we have

$$P\left(\left\|\hat{P}^t(\cdot|s, a) - P^{\mathcal{M}}(\cdot|s, a)\right\|_1 \geq \beta_1(n, t) \mid \mathcal{M}, n \text{ i.i.d. samples}\right) \leq \frac{\delta}{20t^7 M A \tau_{\max} K}.$$

On the other hand, based on the Hoeffding's inequality, if we choose  $\beta_2(n, t) = \sqrt{\frac{7 \log(\frac{2MAK\tau_{\max}t}{\delta})}{2 \max\{1, n\}}}$ , we have

$$P\left(\left|\hat{r}_k^t(s, a, h) - r_k^{\mathcal{M}}(s, a, h)\right| \geq \beta_2(n, t) \mid \mathcal{M}, n \text{ i.i.d. samples}\right) \leq \frac{\delta}{60t^7 M A \tau_{\max} K}.$$

Notice that in episode  $t$ ,  $N^t(s, a)$  is a random variable that can take values  $0, 1, \dots, (t-1)(\tau_{\max} - 1)$  (recall that each episode has horizon  $\tau \leq \tau_{\max}$  with probability 1, and the last state is always  $s_e$ ). Based on our definitions of  $\beta_1$  and  $\beta_2$ , for  $n = 0$  (the case without observations), the confidence intervals trivially hold with probability 1. Thus, union bound over possible values of  $N^t(k_s, a)$  gives

$$\begin{aligned} P\left(\left\|\hat{P}^t(\cdot|s, a) - P^{\mathcal{M}}(\cdot|s, a)\right\|_1 \geq \beta_1(N^t(k_s, a), t) \mid \mathcal{M}\right) &\leq \sum_{n=1}^{t\tau_{\max}} \frac{\delta}{20t^7 M A \tau_{\max} K} < \frac{\delta}{20t^6 M A K} \\ P\left(\left|\hat{r}^t(s, a) - r^{\mathcal{M}}(s, a)\right| \geq \beta_2(N^t(k_s, a), t) \mid \mathcal{M}\right) &\leq \sum_{n=1}^{t\tau_{\max}} \frac{\delta}{60t^7 M A \tau_{\max} K} < \frac{\delta}{60t^6 M A K} \end{aligned}$$

Notice that there are  $A$  actions and at most  $MK$  equivalent state classes. Taking a union bound over actions and equivalent state classes, we have

$$P(\mathcal{M} \notin \mathbb{M}_t | \mathcal{M}) < MAK \left[ \frac{\delta}{60t^6 MAK} + \frac{\delta}{20t^6 MAK} \right] = \frac{\delta}{15t^6}.$$

Since the above result holds for any  $\mathcal{M}$ , we have

$$P(\mathcal{M} \notin \mathbb{M}_t) = \sum_{\mathcal{M}} P(\mathcal{M}) P(\mathcal{M} \notin \mathbb{M}_t | \mathcal{M}) < \frac{\delta}{15t^6}.$$

Since  $\mathcal{M}^t$  and  $\mathcal{M}$  are conditionally i.i.d. given  $\mathcal{H}_t$ , we have

$$P(\mathcal{M}^t \notin \mathbb{M}_t) = \sum_{\mathcal{H}_t} P(\mathcal{H}_t) P(\mathcal{M}^t \notin \mathbb{M}_t | \mathcal{H}_t) = \sum_{\mathcal{H}_t} P(\mathcal{H}_t) P(\mathcal{M} \notin \mathbb{M}_t | \mathcal{H}_t) = P(\mathcal{M} \notin \mathbb{M}_t).$$

This concludes the proof. **q.e.d.**

Note that for any  $\tilde{M}$  that can be sampled from the prior and any policy  $\pi$ , we have naive bounds on  $V^{\tilde{M}, \pi}(s)$ . To see it, recall that we assume  $\mathbb{E}[\tau] \leq H$  for any initial state  $s \in \mathcal{S}$  and the reward support is a subset of  $[0, 1]$ , thus we have  $0 \leq V^{\tilde{M}, \pi}(s) \leq H$  for all  $s \in \mathcal{S}$ . Thus, we have:

$$\begin{aligned} \sum_{t=1}^T \mathbb{E} \left[ V^{\mathcal{M}^t, \pi^t} - V^{\mathcal{M}, \pi^t} \right] &\leq \sum_{t=1}^T \mathbb{E} \left[ \left( V^{\mathcal{M}^t, \pi^t} - V^{\mathcal{M}, \pi^t} \right) \mathbf{1} [\mathcal{M}, \mathcal{M}^t \in \mathbb{M}_t] \right] \\ &\quad + 2H \sum_{t=1}^T P(\mathcal{M} \notin \mathbb{M}_t), \end{aligned} \quad (8)$$

Notice that by choosing  $\delta = \frac{1}{H}$ , we have

$$2H \sum_{t=1}^T P(\mathcal{M} \notin \mathbb{M}_t) < 2H \sum_{t=1}^T \frac{1}{15Ht^6} = \frac{2}{15} \sum_{t=1}^T \frac{1}{t^6} \leq \frac{2}{15} \sum_{t=1}^{\infty} \frac{1}{t^2} < \frac{1}{3}.$$

On the other hand, we have

$$\begin{aligned} &\sum_{t=1}^T \mathbb{E} \left[ \left( V^{\mathcal{M}^t, \pi^t} - V^{\mathcal{M}, \pi^t} \right) \mathbf{1} [\mathcal{M}, \mathcal{M}^t \in \mathbb{M}_t] \right] \\ &= \sum_{t=1}^T \left\{ \mathbb{E} \left[ \sum_{h=1}^{\tau_t-1} \left( \mathcal{T}^{\mathcal{M}^t, \pi^t} - \mathcal{T}^{\mathcal{M}, \pi^t} \right) V^{\mathcal{M}^t, \pi^t}(s_{th}) \middle| \mathcal{M}, \mathcal{M}^t \right] \mathbf{1} [\mathcal{M}, \mathcal{M}^t \in \mathbb{M}_t] \right\} \end{aligned} \quad (9)$$

Notice that if  $\mathcal{M}, \mathcal{M}^t \in \mathbb{M}_t$ , we have

$$\begin{aligned} \left| \left( \mathcal{T}^{\mathcal{M}^t, \pi^t} - \mathcal{T}^{\mathcal{M}, \pi^t} \right) V^{\mathcal{M}^t, \pi^t}(s_{th}) \right| &\leq \left| \bar{r}^{\mathcal{M}^t}(s_{th}, \pi^t(s_{th})) - \bar{r}^{\mathcal{M}}(s_{th}, \pi^t(s_{th})) \right| \\ &\quad + \left\| P^{\mathcal{M}^t}(\cdot | s_{th}, \pi^t(s_{th})) - P^{\mathcal{M}}(\cdot | s_{th}, \pi^t(s_{th})) \right\|_1 \cdot \left\| V^{\mathcal{M}^t, \pi^t} \right\|_{\infty} \\ &\leq 2\beta_2(N^t(k_{s_{th}}, a_{th}), t) + 2\beta_1(N^t(k_{s_{th}}, a_{th}), t)H \end{aligned} \quad (10)$$

To simplify the exposition, we use  $k_{th}$  to denote  $k_{s_{th}}$ . Hence, we have

$$\begin{aligned} &\sum_{t=1}^T \mathbb{E} \left[ \left( V^{\mathcal{M}^t, \pi^t} - V^{\mathcal{M}, \pi^t} \right) \mathbf{1} [\mathcal{M}, \mathcal{M}^t \in \mathbb{M}_t] \right] \\ &\leq 2 \sum_{t=1}^T \mathbb{E} \left\{ \sum_{h=1}^{\tau_t-1} \left[ \beta_2(N^t(k_{th}, a_{th}), t) + \beta_1(N^t(k_{th}, a_{th}), t)H \right] \right\}. \end{aligned}$$

Notice that  $t \leq T$  always holds, with  $\delta = \frac{1}{H}$ , we have

$$\beta_2(N^t(k_{th}, a_{th}), t) + \beta_1(N^t(k_{th}, a_{th}), t)H \leq O \left( H \sqrt{\frac{M \log(AKH\tau_{\max}T)}{\max\{1, N^t(k_{th}, a_{th})\}}} \right).$$

Finally, we provide ‘‘self-normalization’’ bounds for

$$\mathbb{E} \left\{ \sum_{t=1}^T \sum_{h=1}^{\tau_t-1} \sqrt{\frac{1}{\max\{1, N^t(k_{th}, a_{th})\}}} \right\}.$$

Notice that

$$\sum_{t=1}^T \sum_{h=1}^{\tau_t-1} \sqrt{\frac{1}{\max\{1, N^t(k_{th}, a_{th})\}}} = \sum_{(k,a)} \sum_{t=1}^T \sum_{h=1}^{\tau_t-1} \sqrt{\frac{\mathbf{1}[(k_{th}, a_{th}) = (k, a)]}{\max\{1, N^t(k, a)\}}}$$

For any  $(k, a)$ , we have

$$\begin{aligned} \sum_{t=1}^T \sum_h^{\tau_t-1} \sqrt{\frac{\mathbf{1}[(k_{th}, a_{th}) = (k, a)]}{\max\{1, N^t(k, a)\}}} &= \sum_{t=1}^T \sum_h^{\tau_t-1} \sqrt{\frac{\mathbf{1}[(k_{th}, a_{th}) = (k, a)]}{\max\{1, N^t(k, a)\}}} \mathbf{1}[N^t(k, a) \leq \tau_{\max}] \\ &\quad + \sum_{t=1}^T \sum_h^{\tau_t-1} \sqrt{\frac{\mathbf{1}[(k_{th}, a_{th}) = (k, a)]}{\max\{1, N^t(k, a)\}}} \mathbf{1}[N^t(k, a) > \tau_{\max}] \\ &\stackrel{(a)}{<} 2\tau_{\max} + \sum_{n=1}^{N^{T+1}(k,a)} \frac{\sqrt{2}}{\sqrt{n}} \\ &< 2\tau_{\max} + \int_0^{N^{T+1}(k,a)} \frac{\sqrt{2}}{\sqrt{n}} dn = 2\tau_{\max} + 2\sqrt{2N^{T+1}(k, a)}, \end{aligned} \tag{11}$$

where inequality (a) follows from the following observations:

- Since in each episode has maximum horizon  $\tau_{\max}$ , and  $N_t(k, a)$  will be updated at the end of each episode  $t$ , then we have

$$\begin{aligned} &\sum_{t=1}^T \sum_h^{\tau_t-1} \sqrt{\frac{\mathbf{1}[(k_{th}, a_{th}) = (k, a)]}{\max\{1, N^t(k, a)\}}} \mathbf{1}[N^t(k, a) \leq \tau_{\max}] \\ &\leq \sum_{t=1}^T \sum_h^{\tau_t-1} \mathbf{1}[(k_{th}, a_{th}) = (k, a)] \mathbf{1}[N^t(k, a) \leq \tau_{\max}] \leq 2\tau_{\max}. \end{aligned} \tag{12}$$

- Assume  $N^t(k, a) > \tau_{\max}$ , and assume that  $(k, a)$  has been interacted for  $j_t \leq \tau_t$  times in episode  $t$ , then, in episode  $t$  we have

$$\sum_h^{\tau_t-1} \sqrt{\frac{\mathbf{1}[(k_{th}, a_{th}) = (k, a)]}{\max\{1, N^t(k, a)\}}} \mathbf{1}[N^t(k, a) > \tau_{\max}] \leq \sum_{j=1}^{j_t} \sqrt{\frac{2}{N^t(k, a) + j}} \mathbf{1}[N^t(k, a) > \tau_{\max}],$$

which follows from the inequality  $\frac{1}{n} \leq \frac{2}{n+j}$  for  $n > \tau_{\max} \geq \tau_t$  and  $j < \tau_t$ . Hence, we have

$$\sum_{t=1}^T \sum_h^{\tau_t-1} \sqrt{\frac{\mathbf{1}[(k_{th}, a_{th}) = (k, a)]}{\max\{1, N^t(k, a)\}}} \mathbf{1}[N^t(k, a) > \tau_{\max}] \leq \sum_{n=1}^{N^{T+1}(k,a)} \sqrt{\frac{2}{n}}.$$

Thus we have

$$\begin{aligned} \sum_{(k,a)} \sum_{t=1}^T \sum_{h=1}^{\tau_t-1} \sqrt{\frac{\mathbf{1}[(k_{th}, a_{th}) = (k, a)]}{\max\{1, N^t(k, a)\}}} &\leq 2\tau_{\max} \bar{S}A + 2\sqrt{2} \sum_{k,a} \sqrt{N^{T+1}(k, a)} \\ &\stackrel{(b)}{\leq} 2\tau_{\max} \bar{S}A + 2\sqrt{2} \sqrt{\bar{S}A} \sqrt{\sum_{(k,a)} N^{T+1}(k, a)} \end{aligned}$$

where (b) follows from the Cauchy-Schwarz inequality. Hence, we have

$$\begin{aligned}
\mathbb{E} \left\{ \sum_{t=1}^T \sum_{h=1}^{\tau_t-1} \sqrt{\frac{1}{\max\{1, N^t(k_{th}, a_{th})\}}} \right\} &\leq 2\tau_{\max} \bar{S}A + 2\sqrt{2} \sqrt{\bar{S}A} \mathbb{E} \left[ \sqrt{\sum_{(k,a)} N^{T+1}(k, a)} \right] \\
&\leq 2\tau_{\max} \bar{S}A + 2\sqrt{2} \sqrt{\bar{S}A} \sqrt{\mathbb{E} \left[ \sum_{(k,a)} N^{T+1}(k, a) \right]} \\
&\leq 2\tau_{\max} \bar{S}A + 2\sqrt{2} \sqrt{\bar{S}A} \sqrt{\sum_{t=1}^T \mathbb{E} [\tau_t]} \\
&\leq 2\tau_{\max} \bar{S}A + 2\sqrt{2} \sqrt{\bar{S}AHT}.
\end{aligned}$$

Combining the above results, we have

$$\begin{aligned}
\sum_{t=1}^T \mathbb{E} \left[ \left( V^{\mathcal{M}, \tilde{\pi}} - V^{\mathcal{M}, \pi^t} \right) \right] &= \sum_{t=1}^T \mathbb{E} \left[ \left( V^{\mathcal{M}^t, \pi^t} - V^{\mathcal{M}, \pi^t} \right) \right] \\
&\leq O \left( H \sqrt{M \log(AKH\tau_{\max}T)} \left[ \tau_{\max} \bar{S}A + \sqrt{\bar{S}AHT} \right] \right) \\
&= O \left( H^{\frac{3}{2}} \sqrt{M \bar{S}AT \log(AKH\tau_{\max}T)} \right) \\
&= \tilde{O} \left( H^{\frac{3}{2}} \sqrt{M \bar{S}AT} \right) \\
&\leq \tilde{O} \left( H^{\frac{3}{2}} M \sqrt{KAT} \right). \tag{13}
\end{aligned}$$

Hence, we have proved the regret bound. **q.e.d.**

## B Proofs for Propositions in Section 5

### B.1 Proof for Proposition 1

**Proof:** Let  $V^*$  be the optimal value function of  $\mathcal{M}$ , and  $V_{\mathcal{S}_G}^*$  be its restriction to  $\mathcal{S}_G$ . Let  $\mathcal{V} \subset [0, H]^{|\mathcal{S}_G|}$  be the space of possible value functions  $V_{\mathcal{S}_G}^*$ . Note that by definition,  $\mathcal{J}_i$  is the projection of  $\mathcal{V}$  to  $\mathcal{E}_i$ , the exit states of  $\mathcal{M}_i$ .

Notice that  $\mathcal{M}$  can be reduced to an MDP  $\mathcal{M}_R$  with the same state space  $\mathcal{S}_R = \mathcal{S}_G$  as the induced global MDP  $\mathcal{M}_G$ . For each state  $s$  in  $\mathcal{S}_R$ , assume  $s \in \mathcal{S}_i$ , then its action space includes all the deterministic policies in subMDP  $\mathcal{M}_i$ . The transition and reward models  $P^R$  and  $r^R$  are defined similarly as  $P^G$  and  $r^G$ . It is straightforward to see that an optimal policy in  $\mathcal{M}_R$  perfectly recovers an optimal policy in  $\mathcal{M}$ . Let  $\mathcal{T}$  be the dynamic programming operator in  $\mathcal{M}_R$ , and  $\mathcal{T}'$  be the DP operator in  $\mathcal{M}_G$ , then we have

$$\mathcal{T}V - \Delta \mathbf{1} \leq \mathcal{T}'V \leq \mathcal{T}V \quad \forall V \in \mathcal{V},$$

where the first inequality follows from the definition of  $\Delta$ , and the second inequality follows from the fact that  $\mathcal{T}$  has a larger action space.

We now prove Proposition 1 under Assumption 1 and a mild technical assumption that  $\mathcal{T}^l \mathbf{0} \in \mathcal{V}$ , for  $l = 0, \dots, |\mathcal{E}|$ .

Let  $L = |\mathcal{E}|$ . Recall that  $\mathcal{S}_G = \mathcal{E} \cup \{s_0\}$ , thus  $\mathcal{S}_G$  has at most  $L + 1$  states, and one of them is the terminal state  $s_e$ . Under Assumption 1, with VI with initial  $V = \mathbf{0}$ , both  $\mathcal{T}$  and  $\mathcal{T}'$  will compute the value function in  $L$  iterations, that is  $V^* = \mathcal{T}^L \mathbf{0}$ , and  $V^{\tilde{\pi}} = (\mathcal{T}')^L \mathbf{0}$ . We now prove that  $(\mathcal{T}')^l \mathbf{0} \geq \mathcal{T}^l \mathbf{0} - l\Delta \mathbf{1}$  for all  $l = 0, 1, \dots, L$  by induction. Notice that this inequality trivially holds for  $l = 0$ . Assume it holds for  $l$ , then we have

$$\begin{aligned}
(\mathcal{T}')^{l+1} \mathbf{0} = \mathcal{T}'((\mathcal{T}')^l \mathbf{0}) &\stackrel{(a)}{\geq} \mathcal{T}'(\mathcal{T}^l \mathbf{0} - \epsilon \mathbf{1}) \stackrel{(b)}{=} \mathcal{T}'(\mathcal{T}^l \mathbf{0}) - \Delta \mathbf{1} \\
&\stackrel{(c)}{\geq} \mathcal{T}^{l+1} \mathbf{0} - \Delta \mathbf{1} - \Delta \mathbf{1} = \mathcal{T}^{l+1} \mathbf{0} - \Delta(l+1)\mathbf{1},
\end{aligned}$$

where (a) follows from the induction hypothesis and the monotonicity of  $\mathcal{T}'$ , (b) follows from the ‘‘constant-shift’’ property of DP operator, and (c) follows from  $\mathcal{T}^l \mathbf{0} \in \mathcal{V}$  by induction. Thus, we have  $V^{\tilde{\pi}} = (\mathcal{T}')^L \mathbf{0} \geq \mathcal{T}^L \mathbf{0} - L\Delta \mathbf{1} = V^* - L\Delta \mathbf{1}$ . So we have  $V^{\tilde{\pi}}(s_0) \geq V^*(s_0) - L\Delta$ .

Finally, we justify that the technical assumption  $\mathcal{T}^l \mathbf{0} \in \mathcal{V}$ , for  $l = 0, \dots, |\cup_i \mathcal{E}_i|$  is mild. Notice that we have  $\mathbf{0} \leq \mathcal{T} \mathbf{0}$  since the rewards are non-negative. Thus, from the monotonicity of  $\mathcal{T}$ , we have

$$\mathbf{0} \leq \mathcal{T} \mathbf{0} \leq \mathcal{T}^2 \mathbf{0} \leq \dots \leq \mathcal{T}^L \mathbf{0} = V^*.$$

Define  $\mathbb{V} = \{V : \mathcal{S}_G \rightarrow \mathbb{R}^+ \text{ s.t. } 0 \leq V(s) \leq V^*(s) \forall s \in \mathcal{S}_G\}$ . Thus, if  $\mathbb{V} \subseteq \mathcal{V}$ , then this technical assumption holds. **q.e.d.**

## B.2 Proof for Proposition 2

**Proof:** Recall that for any policy  $\pi$ , any exit value profile  $J$  and any possible start state  $s$ , we have  $V_J^\pi(s) = V_0^\pi(s) + \rho^\pi(s)J$ , where  $\rho^\pi(s)$  is a row vector encoding the probability distribution over the exit states when the start state is  $s$  and policy  $\pi$  is applied. Thus, for any exit values  $J$  and  $J'$ , we have

$$\begin{aligned} V_J^\pi(s) &= V_0^\pi(s) + \rho^\pi(s)J = V_0^\pi(s) + \rho^\pi(s)J' + \rho^\pi(s)[J - J'] \\ &= V_{J'}^\pi(s) + \rho^\pi(s)[J - J'] \leq V_{J'}^\pi(s) + \|J - J'\|_\infty, \end{aligned}$$

where the last inequality follows from  $\rho^\pi(s)[J - J'] \leq |\rho^\pi(s)[J - J']| \leq \|\rho^\pi(s)\|_1 \|J - J'\|_\infty = \|J - J'\|_\infty$ .

Thus, if  $\tilde{\mathcal{J}}_k$  is an  $\epsilon$ -cover for  $\mathcal{J}_i$ , then by definition, there exists  $\tilde{J} \in \tilde{\mathcal{J}}_k$  s.t.  $\|J - \tilde{J}\|_\infty \leq \epsilon$ . So we have

$$V_J^*(s) = V_J^{\pi_J}(s) \stackrel{(a)}{\leq} V_{\tilde{J}}^{\pi_J}(s) + \epsilon \stackrel{(b)}{\leq} V_{\tilde{J}}^{\pi_{\tilde{J}}}(s) + \epsilon \stackrel{(c)}{\leq} V_{\tilde{J}}^{\pi_{\tilde{J}}}(s) + 2\epsilon, \quad (14)$$

where (a) and (c) follow from the inequality above and  $\|J - \tilde{J}\|_\infty \leq \epsilon$ , and (b) follows from that  $\pi_{\tilde{J}}$  is an optimal policy with exit value  $\tilde{J}$ . Hence, we have  $\Delta_i(\tilde{\mathcal{J}}_k) \leq 2\epsilon$ . **q.e.d.**

## B.3 Proof for Proposition 3

**Proof:** Consider an arbitrary exit profile  $J$  and an arbitrary start state  $s$ . Due to the deterministic exit assumption, under the deterministic optimal policy  $\pi_J$ , the agent will deterministically exit at an exit state  $e \in J_i$ .

One key observation is that under the policy  $\pi_{J_e}$ , the agent will also exit at  $e$ . To see it, notice that the fact that the agent exits at  $e$  under  $\pi_J$  implies that there exist policies under which the agent exits at  $e$  from the start state  $s$ . Moreover, under  $J_e$ , for any deterministic policy  $\pi$  that does not exit at  $s_e$ , we have  $V_{J_e}^\pi(s) \leq H$ . On the other hand, for any deterministic policy  $\pi$  that exits at  $e$ , we have

$$V_{J_e}^\pi(s) = V_0^\pi(s) + H + 1 \geq H + 1.$$

Thus,  $\pi_{J_e}$ , the optimal policy under the exit value  $J_e$ , must exit at state  $e$ .

Hence we have:

$$\begin{aligned} V_J^*(s) &\stackrel{(a)}{=} V_J^{\pi_J}(s) \stackrel{(b)}{=} V_{J_e}^{\pi_J}(s) + J(e) - J_e(e) \stackrel{(c)}{\leq} V_{J_e}^{\pi_{J_e}}(s) + J(e) - J_e(e) \\ &\stackrel{(d)}{=} V_{J_e}^{\pi_{J_e}}(s) \leq V_J^*(s), \end{aligned} \quad (15)$$

where (a) follows from the definition of  $\pi_J$ , (b) follows from the fact that under  $\pi_J$ , the agent exits at  $e$ , and (c) follows from the fact that  $\pi_{J_e}$  is optimal under the exit value  $J_e$ , and (d) follows from the fact that under  $\pi_{J_e}$ , the agent exits at  $e$ . Consequently,  $\pi_{J_e}$  is an optimal policy under the exit value  $J$ , and hence  $\tilde{\mathcal{J}}_k = \{J_e : e \in \mathcal{E}_i\}$  satisfies  $\Delta_i(\tilde{\mathcal{J}}_k) = 0$ . **q.e.d.**
